# Supplementary material for: Tetra-Fe(iii) and deca-Mn(iii) metallacrowns built from bis-salicylhydrazide ligands: synthesis, structures and magnetic properties
Source: Royal Society of Chemistry journal article supplement (doi:10.1039/c6ce01100d), 2016-01-01
Supplement: c6ce01100d1.pdf [file c6ce01100d1.pdf]

## **Supporting Information**

### **Tetra-Fe(III) and deca-Mn(III) metallocrown built from bis-salicylhydrazide ligand: synthesis, structures and magnetic properties**

**Jia-li Pan, Qian Guo, Bing Yang, Yu-yi Li, Jin-ge Cao, Xiang-gao Meng\* and  
Feng-ping Xiao\***

Key Laboratory of Pesticide and Chemical Biology of Ministry of Education, College  
of Chemistry, Central China Normal University, Wuhan 430079, China.

E-mail: [mengxianggao@mail.ccnu.edu.cn](mailto:mengxianggao@mail.ccnu.edu.cn); [fpxiao@mail.ccnu.edu.cn](mailto:fpxiao@mail.ccnu.edu.cn)

## Table of Contents

|                                                                                                                                      |    |
|--------------------------------------------------------------------------------------------------------------------------------------|----|
| <b>Comment S1</b> Materials and characterization for complexes 1-4.....                                                              | 3  |
| <b>Comment S2</b> Syntheses of complexes 1-4.....                                                                                    | 3  |
| <b>Comment S3</b> X-ray crystallography for complexes 1-4.....                                                                       | 4  |
| <b>Table S1</b> A Cambridge Structural Database (CSD) search result based on a [M-N-N]- containing metallacrown structural unit..... | 6  |
| <b>Table S2</b> Crystal parameters of compound 1-4.....                                                                              | 11 |
| <b>Table S3</b> Some selected bond lengths and angles in complexes 1-4.....                                                          | 11 |
| <b>Table S4</b> The hydrogen bonds parameters in complexes 1 and 2.....                                                              | 17 |
| <b>Fig. S1</b> The indexing structural unit used in the CSD search for metallacrowns.....                                            | 17 |
| <b>Fig. S2</b> The structure of compound 2 without solution molecules and (b) the octahedral cage inside.....                        | 17 |
| <b>Fig. S3</b> The hydrogen bonds between four coordinated water and eight lattice solvent molecules DMF.....                        | 17 |
| <b>Fig. S4</b> The structure of compound 4 without hydrogen atoms and solvent molecules.....                                         | 18 |
| <b>Fig. S5</b> The theoretical and experimental PXRD of compounds 1-4.....                                                           | 18 |
| <b>Fig. S6</b> The IR spectra of the compounds 1-4 (red) and the relative ligands (black).....                                       | 19 |
| <b>Fig. S7</b> The UV spectra of the compounds 1-4 and the relative ligands.....                                                     | 19 |
| <b>Fig. S8</b> Cyclic voltammetry (CV) of compounds 1-4 in DMF.....                                                                  | 20 |
| <b>Fig. S9</b> Thermo grametric of compounds 1-4.....                                                                                | 20 |
| <b>References</b> .....                                                                                                              | 20 |

### Comment S1: Materials and characterization for complexes 1-4.

C, H, N elemental analyses were performed on an Elementar Vario MICRO E III analyzer. IR spectra were recorded as KBr pellets on a Perkin Elmer spectrometer. Ultraviolet spectra were recorded using a Shimadzu UV-3600 Spectrophotometer. TGA was performed on a NETZSCH STA 449C thermo-gravimetric analyzer in flowing N<sub>2</sub> with a heating rate of 10 °C min<sup>-1</sup>. Powder X-ray diffraction patterns (PXRD) were acquired on a D8 Advance X-ray diffractometer operating at 40 kV and 40 mA with Cu K $\alpha$  radiation ( $\lambda = 1.5406 \text{ \AA}$ ). Single crystal X-ray data were collected using BRUKER APEX DUO CCD diffractometer with Mo-K $\alpha$  radiation ( $\lambda = 0.71073 \text{ \AA}$ ). Magnetic moments were recorded using a Quantum Design MPMS SQUID magnetometer over the temperature range 5 to 300K. The magnetic data were collected in an applied field of 0.2 T and corrected for diamagnetism using a Pascal's constants according to a reference<sup>1</sup>.

The cyclic voltammetry (CV) studies were performed on an electrochemical workstation (CHI 660, Shanghai CH Instruments Co., China) in a single compartment cell with three-electrode configuration, which consisted of working electrode, a platinum gauze as auxiliary electrode, and Ag/Ag<sup>+</sup> (0.01 M AgNO<sub>3</sub> in 0.1 M tetrabutylammonium hexafluorophosphate–MeCN) as reference electrode. The reference electrode was stabilized in a glass tube with a Luggin capillary, which was filling with corresponding catholyte. CV measurements in nitrogen gas-saturated electrolyte were taken between -1.5 V and 1.5 V vs. Ag/Ag<sup>+</sup> at a sweep rate 100 mV·s<sup>-1</sup>. Prior to experiments, all the metal electrodes (0.5 cm×0.5 cm) were polished with fine sand paper and then were sonicated in acetone for 10 min, followed by washing with water and ethanol, and finally dried in N<sub>2</sub> atmosphere.

### Comment S2: Syntheses of complexes 1-4.

#### Synthesis of H<sub>6</sub>PentaCShz

5-Chloro salicylic acid hydrazide (7.63g, 0.041mol), glutaryl chloride (3.21g, 0.019mol) and pyridine (0.057mol) were dissolved in DMF (50mL) and stirred for two hours at 50°C. A white precipitate was obtained after slowly warming the solution up to room temperature. This was filtered off and rinsed with chloroform and diethyl ether and dried at 100°C in an oven (Yield: 5.15g, 57.8%). *Anal./Calcd.* for C<sub>19</sub>H<sub>18</sub>N<sub>4</sub>O<sub>6</sub>Cl<sub>2</sub>: C 48.63; H 3.87; N 11.94. Found: C 48.65; H 3.90; N 12.00. <sup>1</sup>HNMR(DMSO-d<sub>6</sub>)  $\delta$ (ppm): 11.91 (s,2H; -<sub>ph</sub>-OH), 10.54 (s,2H; -<sub>ph</sub>CO-NH-), 10.26 (s, 2H; -NH-COCH<sub>2</sub>-), 8.89 (d,2H; <sub>o-ph</sub>CH), 7.89-7.90 (m,2H; <sub>p-ph</sub>CH), 6.99-7.01(m, 2H; <sub>m-ph</sub>CH), 1.84-2.26 (s,6H; -CH<sub>2</sub>CH<sub>2</sub>CH<sub>2</sub>-); <sup>13</sup>CNMR (DMSO-d<sub>6</sub>)  $\delta$ (ppm): 170.81 (-<sub>NH</sub>-CO-CH<sub>2</sub>-), 165.51 (-<sub>ph</sub>-CO-NH), 157.668 (-<sub>ph</sub>C-OH), 135.91 (<sub>Ph</sub>C), 128.46 (<sub>o-ph</sub>C), 119.69 (<sub>m-ph</sub>C), 117.05 (<sub>Ph</sub>C-CO-), 110.33(<sub>m-ph</sub>C), 32.80 (-CO-CH<sub>2</sub>-CH<sub>2</sub>-), 21.46 (-COCH<sub>2</sub>-CH<sub>2</sub>-); IR (KBr pellet, cm<sup>-1</sup>):  $\nu_{\text{N-H}}$ ,3224(b);  $\nu_{\text{O-H}}$ , 3348(s), broad;  $\nu_{\text{C=O}}$ ,1634(s);  $\nu_{\text{C=N}}$ ,1585(s);  $\nu_{\text{C-N}}$ ,1353(s);  $\nu_{\text{(-C-C-C)phenolic}}$ ,1224(vs).

#### Synthesis of H<sub>6</sub>PentaBShz

H<sub>6</sub>PentaBShz was prepared in a similar method to ligand H<sub>6</sub>PentaCShz except for the amount of the 5-Bromo salicylic acid hydrazide (9.712g, 0.042mol). (Yield: 6.4g, 72%). *Anal./Calcd.* for C<sub>19</sub>H<sub>18</sub>N<sub>4</sub>O<sub>6</sub>Br<sub>2</sub>: C 40.88; H 3.25; N 10.04. Found: C 40.85; H 3.50; N 10.07.

<sup>1</sup>HNMR(DMSO-d<sub>6</sub>), δ(ppm): 11.9 (s,2H; -<sub>ph</sub>-OH), 10.57 (s,2H; -<sub>ph</sub>CO-NH-), 10.29 (s,2H; -NH-COCH<sub>2</sub>-), 8.024 (d,2H; <sub>o-ph</sub>CH), 7.59-7.60 (m,2H; <sub>p-ph</sub>CH), 6.93-6.96 (m, 2H; <sub>m-ph</sub>CH) 1.62-2.25 (s,6H; -CH<sub>2</sub>CH<sub>2</sub>CH<sub>2</sub>-); <sup>13</sup>CNMR (DMSO-d<sub>6</sub>) δ(ppm): 170.52(-NH-CO-CH<sub>2</sub>-), 164.99 (-<sub>ph</sub>-CO-NH-), 157.784 (-<sub>ph</sub>C-OH), 136.40 (<sub>p-Ph</sub>C), δ131.058 (<sub>o-ph</sub>C), 119.72(<sub>m-ph</sub>C), 117.247(PhC-CO-), 110.28(<sub>m-Ph</sub>C), 33.91 (-CO-CH<sub>2</sub>-CH<sub>2</sub>-), 25.22 (-COCH<sub>2</sub>.CH<sub>2</sub>-); IR (KBr pellet,cm<sup>-1</sup>): ν<sub>N-H</sub>, 3409(b); ν<sub>O-H</sub>, 3319(s), broad; ν<sub>C=O</sub>, 1631(s); ν<sub>C=N</sub>, 1582(s); ν<sub>C-N</sub>, 1368(s); ν<sub>C-C=C</sub>(phenolic), 1483(vs).

### Synthesis of [Fe<sub>4</sub>(PentaCShz)<sub>2</sub>(H<sub>2</sub>O)<sub>4</sub>]·8DMF (1)

H<sub>6</sub>PentaCShz (0.0469g, 0.1 mmol) was dissolved in 20.0mL DMF firstly, to which FeCl<sub>3</sub> (0.0324 g, 0.2 mmol ) was then added slowly. And then ten drops of pyridine were added into the solution to adjust the pH value to be ca. 7.0. The mixed solution was stirred for two hours at room temperature and the resulted solution was filtered. The filtrate was standing for two weeks at ambient temperature. Crystals suitable for X-ray diffraction experiment were obtained at the bottom of the vessel. (Yield: 56.6mg, 62%). *Anal./Calcd.* for Fe<sub>4</sub>C<sub>62</sub>H<sub>88</sub>N<sub>16</sub>O<sub>24</sub>Cl<sub>4</sub> (M<sub>r</sub>=1806.68): C 41.22; H 4.91; N 12.40. Found: C 40.80; H 4.96; N 12.28. IR (KBr pellet, cm<sup>-1</sup>): 3439(m,br), 2928(w), 1654(vs), 1597(w), 553(s), 1508(vs), 1420(m), 1404(vs), 1370(vs), 1307(w), 1249(w), 1098(w), 920(w), 829(w), 808(w), 773(w), 728(m), 703(w), 667(w)cm<sup>-1</sup>.

### Synthesis of [Fe<sub>4</sub>(PentaBShz)<sub>2</sub>(H<sub>2</sub>O)<sub>4</sub>]·8DMF (2)

Compound 2 was prepared in an analogous procedure to 1 except for the amount of the H<sub>6</sub>PentaBShz (0.0558g, 0.1 mmol). (Yield: 47.2mg, 48%). *Anal./Calcd.* for Fe<sub>4</sub>C<sub>62</sub>H<sub>88</sub>N<sub>16</sub>O<sub>24</sub>Br<sub>4</sub> (M<sub>r</sub>=1984.52): C 37.52; H 4.47; N 11.29. Found: C 36.85; H 4.58; N 11.08. IR(KBr,pellet,cm<sup>-1</sup>): 3454(m,br), 2368(w), 1870(w), 1845(w), 1831(w), 1793(w), 1773(w), 1735(w), 1718(w), 1701(w), 1685(w), 1654(w), 1591(m), 1550(vs), 1507(vs), 1458(w), 1420(vs), 1404(w), 1369(w), 1330(w), 1304(w),1249(w), 1116(w), 1016(w), 915(w), 829(w), 774(w), 710(w), 669(w), 659(w), 622(w), 607(w),541(w),431(w).

### Synthesis of [Mn<sub>10</sub>(PentaCShz)<sub>5</sub>(DMF)<sub>4</sub>·(Py)<sub>2</sub>·(H<sub>2</sub>O)<sub>4</sub>] (3)

Compound 3 was prepared in an analogous procedure to 1 except for the amount of the H<sub>6</sub>PentaCShz (0.0469g, 0.1 mmol) and Mn(OAc)<sub>2</sub>·4H<sub>2</sub>O (0.049 g, 0.2 mmol) . (Yield: 71.4mg, 30% . Note, the squeezed DMF solvent molecules were taken into account in the formula weight). *Anal./Calcd.* for Mn<sub>10</sub>C<sub>174</sub>H<sub>235</sub>N<sub>41</sub>O<sub>56</sub>Cl<sub>10</sub> (M<sub>r</sub>=4693.75): C 44.53; H 5.11; N 12.32. Found: C 44.42; H 4.76; N 11.44. IR(KBr , pellet, cm<sup>-1</sup>): 3440(m,br), 2931(w), 1657(vs), 1600(s), 1557(vs) 1513(vs), 1426(vs), 1382(vs), 1360(vs), 1303(s), 1268(m), 1247(m), 1151(m), 1103(m), 1001(w), 897(w), 857(w), 825(w), 799(w), 768(w), 734(s), 698(w), 641(m), 560(w), 540(w), 448(w).

### Synthesis of [Mn<sub>10</sub>(PentaBShz)<sub>5</sub>(DMF)<sub>4</sub>·(Py)<sub>2</sub>·(H<sub>2</sub>O)<sub>4</sub>] (4)

Compound 3 was prepared in an analogous procedure to 1 except for the amount of the H<sub>6</sub>PentaBShz (0.0558g, 0.1 mmol) and Mn(OAc)<sub>2</sub>·4H<sub>2</sub>O (0.049 g, 0.2 mmol) . (Yield: 78.3mg, 28% Note, the squeezed DMF solvent molecules were taken into account in the formula weight). *Anal./Calcd.* for Mn<sub>10</sub>C<sub>193</sub>H<sub>278</sub>N<sub>46</sub>O<sub>62</sub>Br<sub>10</sub> (M<sub>r</sub>=5570.57): C 41.52; H 5.02; N 11.54. Found: C 40.07; H 4.16; N 10.12. IR(KBr,pellet,cm<sup>-1</sup>): 3439(m,br), 2929(w), 1656(vs), 1595(vs), 1556(vs),

1509(vs), 1425(vs), 1379(vs), 1307(vs), 1268(vs), 1104(m), 1001(w), 910(w), 857(m), 823(w), 767(m), 715(m), 671(m), 629(m), 558(w), 534(w).

The larger deviations between the theoretical and found values for elemental analysis in 3-4 should be due to the losing of some crystallized molecules as for their easily deteriorating natures at room temperature.

**Comment S3: X-ray crystallography for complexes 1-4.**

Single-crystal X-ray data for complexes 1–4 were collected on an Bruker Apex (II) Duo diffractometer using graphite monochromated Mo-K $\alpha$  ( $\lambda=0.71073$  Å) radiation at 150K. Empirical absorption correction was applied. The structures were solved by direct methods and refined by the full-matrix least-squares methods on  $F^2$  using the SHELX-97 software<sup>2</sup>. All non-hydrogen atoms were refined anisotropically. All of the hydrogen atoms were placed in the calculated positions. The crystal data and structure refinements for H<sub>2</sub>L and complexes 1–4 are summarized in Table S1. The solvent molecules are seriously disordered although the crystal was determined at 150K. Then the contributions of these solvent molecules are taken into account using the SQUEEZE/PLATON program<sup>3</sup>.

For **1**, due to some untreated disorders of atoms in DMF solvent (C11/C12/N3, C14/C15/N4/C16), some slightly abnormal thermal factors were resulted in which do not affect the discussion of the crystal structure. Hydrogen atoms bonded to water molecules were initially found from the difference maps and then be constrained to be at their indicative positions with the O-H distance of 0.82Å and  $U_{\text{iso}}(\text{H})=1.5U_{\text{eq}}(\text{O})$ .

For **2**, these two DMF solvent (C1S/C2S/N1S/C3S/O1S, C1T/C2T/N1T/C3T/O1T) are both disordered over two sites. They are refined with the final site occupancies of 0.84(1):0.16(1) and 0.60(1):0.40(1) for the major and minor components, respectively. In the refinement, the commands ‘DFIX’, ‘DANG’, ‘EDAP’, ‘FLAT’ and ‘ISOR’ were used to restrain some bond distances, angles and some thermal factors, etc. Similar to the treatment of water hydrogen atoms, hydrogen atoms bonded to water O4 atom were initially found from the difference maps and then be constrained to be at their ideal positions with the O-H distance of 0.82Å and  $U_{\text{iso}}(\text{H})=1.5U_{\text{eq}}(\text{O})$ .

For **3**, although the crystals selected were determined at 150K, the non-coordinated solvent molecules could not be modelled by discrete atoms due to the weak diffraction ability of the crystal selected for x-ray experiment. Then, in the final structural refinement a PLATON/SQUEEZE treatment was employed to take into account the diffraction contribution of the solvent molecules and, thereby, to produce a set of solvent-free diffraction intensities.<sup>2</sup> The reported refinements are of the guest-free structures using the \*.hkp files. The SQUEEZE calculations showed a total solvent accessible area volume of 4898.9 Å<sup>3</sup> in **3** and the residual electron density amounted to 1526 e per unit cell, corresponding to nearly 38.2 molecules of DMF (about nineteen DMF molecules per asymmetric unit), i.e. every

[Mn<sub>10</sub>(PentaCShz)<sub>5</sub>(DMF)<sub>4</sub>(Py)<sub>2</sub>(H<sub>2</sub>O)<sub>4</sub>] unit was distributed 19 DMF molecules. The suitable formula of e should be [Mn<sub>10</sub>(PentaCShz)<sub>5</sub>(DMF)<sub>4</sub>(Py)<sub>2</sub>(H<sub>2</sub>O)<sub>4</sub>·(DMF)<sub>19</sub>. And some related items in the cif file such as *D*<sub>calc</sub>, F(000) and formula weight should consider this. For the coordinated DMF (C1U/C2U/N1U/C3U/O1U, C1V/C2V/N1V/C3V/O1V, C1W/C2W/N1W/C3W/O1W and C1X/C2X/N1X/C3X/O1X) and pyridine (C1S/C2S/C3S/C4S/C5S/N1S and C1T/C2T/C3T/C4T/C5T/N1T) molecules, the thermal factors are indicative of medium disorder and then some commands 'DFIX', 'DANG', 'SADI', 'ISOR' and 'FLAT' were used to restrain some bond distances, angles and thermal factors. The positions of water hydrogen atoms were calculated by using PLATON<sup>3</sup>.

For **4**, the crystal was tested and refined in a similar way. In the final structural refinement a PLATON/SQUEEZE treatment was employed to give a total solvent accessible area volume of 4263.7 Å<sup>3</sup> in **3** and the residual electron density amounted to 1879.7 e per unit cell, corresponding to nearly 48 molecules of DMF (about 24 DMF molecules per asymmetric unit), i.e. every [Mn<sub>10</sub>(PentaCShz)<sub>5</sub>(DMF)<sub>4</sub>(Py)<sub>2</sub>(H<sub>2</sub>O)<sub>4</sub>] unit was distributed 24 DMF molecules. Also in the refinement, similar commands to that in **3** have applied.

**Table S1 A Cambridge Structural Database (CSD) search based on the [M-N-N]-containing metallacrown structural unit.**

| No. | Refcode | Space group        | a    | b    | c    | $\alpha$ | $\beta$ | $\gamma$ | V       | Nuclearity | Substitue R                   |
|-----|---------|--------------------|------|------|------|----------|---------|----------|---------|------------|-------------------------------|
| 1   | AFOGOR  | P-1                | 11.5 | 14.0 | 15.8 | 111.4    | 90.6    | 105.6    | 2253.6  | 6 Co       | NH <sub>2</sub>               |
| 2   | AFOGUX  | P-1                | 10.2 | 13.0 | 15.0 | 85.2     | 85.6    | 68.2     | 1830.6  | 6 Co       | H                             |
| 3   | AFOHAE  | P2 <sub>1</sub> /n | 13.3 | 19.3 | 16.3 | 90.0     | 108.3   | 90.0     | 3950.4  | 6 Co       | Methyl                        |
| 4   | AFOHEI  | P-1                | 11.8 | 14.5 | 16.5 | 65.2     | 73.9    | 74.9     | 2416.4  | 6 Co       | Eethyl                        |
| 5   | BEYSIJ  | C2/c               | 30.3 | 15.5 | 26.9 | 90.0     | 121.9   | 90.0     | 10716.4 | 6 Fe       | Methyl                        |
| 6   | BEYSOP  | P2 <sub>1</sub> /c | 15.0 | 14.4 | 22.8 | 90.0     | 106.4   | 90.0     | 4741.5  | 6 Fe       | Methyl                        |
| 7   | BULVIO  | P-1                | 13.6 | 15.6 | 16.4 | 97.9     | 107.1   | 112.3    | 2943.0  | 6 Fe       | (Z)3-methoxy-3-oxoprop-1-enyl |
| 8   | CEGKUV  | R-3c               | 17.3 | 17.3 | 52.4 | 90.0     | 90.0    | 120.0    | 13512.5 | 6 Mn       | Methyl                        |
| 9   | COVBUL  | P6 <sub>3</sub>    | 27.8 | 27.8 | 26.5 | 90.0     | 90.0    | 120.0    | 17746.7 | 15 Mn      | 2-phenyl-acetylenyl           |
| 10  | ECAFUJ  | P-1                | 10.2 | 13.0 | 14.9 | 85.2     | 85.3    | 67.8     | 1822.8  | 6 Co       | H                             |
| 11  | ECAGAQ  | P-1                | 22.9 | 17.6 | 14.4 | 89.9     | 109.1   | 89.9     | 5488.6  | 6 Fe       | Methyl                        |
| 12  | ECAGEU  | R-3                | 17.9 | 17.9 | 32.8 | 90.0     | 90.0    | 120.0    | 9118.5  | 6 Fe       | Eethyl                        |

|    |        |                                |      |      |      |       |       |       |         |              |                               |
|----|--------|--------------------------------|------|------|------|-------|-------|-------|---------|--------------|-------------------------------|
| 13 | ECAGIY | C2/c                           | 28.6 | 16.1 | 28.3 | 90.0  | 118.7 | 90.0  | 11383.2 | <b>6 Fe</b>  | n-Pentyl                      |
| 14 | ECAGOE | P <sub>2</sub> <sub>1</sub>    | 18.1 | 13.6 | 34.3 | 90.0  | 94.8  | 90.0  | 8423.1  | <b>6 Ga</b>  | H                             |
| 15 | ECAGUK | P-1                            | 10.8 | 15.3 | 15.9 | 115.4 | 93.6  | 102.3 | 2283.7  | <b>6 Ga</b>  | Methyl                        |
| 16 | ECAHAR | P <sub>2</sub> <sub>1</sub> /c | 14.5 | 17.0 | 21.6 | 90.0  | 103.3 | 90.0  | 5169.1  | <b>6 Ga</b>  | Eethyl                        |
| 17 | ECAHEV | P-1                            | 14.7 | 15.4 | 20.1 | 70.3  | 74.1  | 74.8  | 4037.1  | <b>6 Ga</b>  | n-undecyl                     |
| 18 | EGETAM | P-1                            | 26.7 | 28.3 | 30.1 | 92.1  | 94.3  | 108.3 | 21413.4 | <b>16 Mn</b> | Biphenyl                      |
| 19 | EGETEQ | P <sub>2</sub> <sub>1</sub>    | 35.4 | 24.5 | 36.8 | 90.0  | 110.9 | 90.0  | 29757.9 | <b>20 Mn</b> | 2,2-diphenylethyl             |
| 20 | FATKER | I <sub>4</sub> <sub>1</sub> /a | 41.4 | 41.4 | 17.8 | 90.0  | 90.0  | 90.0  | 30480.3 | <b>6 Mn</b>  | n-undecyl                     |
| 21 | FATKIV | R-3                            | 51.7 | 51.7 | 20.4 | 90.0  | 90.0  | 120.0 | 47036.1 | <b>6 Mn</b>  | n-heptyl                      |
| 22 | FEPTOK | R-3                            | 30.2 | 30.2 | 9.3  | 90.0  | 90.0  | 120.0 | 7371.3  | <b>6 Mn</b>  | Methyl                        |
| 23 | FUZVOM | P-3                            | 25.4 | 25.4 | 14.7 | 90.0  | 90.0  | 120.0 | 8202.9  | <b>6 Fe</b>  | Eethyl                        |
| 24 | GOMHAS | R-3                            | 32.0 | 32.0 | 10.8 | 90.0  | 90.0  | 120.0 | 9539.4  | <b>6 Mn</b>  | Methyl                        |
| 25 | GUJDOF | P-1                            | 20.5 | 21.0 | 21.8 | 61.3  | 67.0  | 80.4  | 7556.8  | <b>8 Mn</b>  | Isopropyl                     |
| 26 | GUJGIC | Ia-3                           | 27.3 | 27.3 | 27.3 | 90.0  | 90.0  | 90.0  | 20377.7 | <b>6 Mn</b>  | Methyl                        |
| 27 | HEPPIC | P <sub>4</sub> <sub>2</sub> /n | 39.3 | 39.3 | 17.8 | 90.0  | 90.0  | 90.0  | 27514.4 | <b>20 Mn</b> | (E)-styryl                    |
| 28 | HILWEE | P-1                            | 10.0 | 15.1 | 15.6 | 112.1 | 106.6 | 100.0 | 1989.8  | <b>6 Mn</b>  | Eethyl                        |
| 29 | HULPOU | R-3                            | 18.0 | 18.0 | 28.9 | 90.0  | 90.0  | 120.0 | 8112.8  | <b>6 Mn</b>  | Eethyl                        |
| 30 | IFARUC | P <sub>2</sub> <sub>1</sub> /n | 16.0 | 19.5 | 16.2 | 90.0  | 118.2 | 90.0  | 4446.0  | <b>6 Fe</b>  | Methyl                        |
| 31 | IJAJIN | P <sub>2</sub> <sub>1</sub> /n | 16.3 | 20.9 | 17.7 | 90.0  | 100.7 | 90.0  | 5908.5  | <b>6 Fe</b>  | Eethyl                        |
| 32 | IJAKAG | P-1                            | 20.2 | 22.0 | 22.1 | 60.9  | 73.5  | 74.1  | 8142.6  | <b>8 Mn</b>  | Eethyl                        |
| 33 | IPEBUB | P-1                            | 9.4  | 14.1 | 14.2 | 85.0  | 82.8  | 74.0  | 1782.0  | <b>6 Cr</b>  | Methyl                        |
| 34 | IXUCUZ | P-1                            | 20.0 | 20.3 | 20.6 | 77.8  | 66.1  | 66.3  | 6995.2  | <b>8 Fe</b>  | Isopropyl                     |
| 35 | KADQUD | P-1                            | 13.6 | 15.6 | 16.4 | 96.9  | 107.2 | 112.7 | 2941.7  | <b>6 Fe</b>  | (Z)3-methoxy-3-oxoprop-1-enyl |
| 36 | KEMQID | P <sub>2</sub> <sub>1</sub> /n | 20.6 | 13.5 | 20.7 | 90.0  | 95.3  | 90.0  | 5730.4  | <b>6 Mn</b>  | Methyl                        |

|    |        |                    |      |      |      |       |       |       |         |              |                               |
|----|--------|--------------------|------|------|------|-------|-------|-------|---------|--------------|-------------------------------|
| 37 | KENDUD | P4 <sub>2</sub> /n | 27.0 | 27.0 | 18.8 | 90.0  | 90.0  | 90.0  | 13721.4 | <b>12 Mn</b> | cyclohexenyl                  |
| 38 | KENFAL | P4 <sub>2</sub> /n | 27.2 | 27.2 | 18.9 | 90.0  | 90.0  | 90.0  | 13974.6 | <b>12 Mn</b> | cyclohexenyl                  |
| 39 | KENFEP | P4 <sub>2</sub> /n | 27.1 | 27.1 | 18.9 | 90.0  | 90.0  | 90.0  | 13859.3 | <b>12 Mn</b> | cyclohexenyl                  |
| 40 | KIGPAS | P2 <sub>1</sub> /n | 16.5 | 15.4 | 21.0 | 90.0  | 103.9 | 90.0  | 5177.8  | <b>6 Mn</b>  | Eethyl                        |
| 41 | KUPKUC | P-1                | 15.3 | 15.8 | 16.3 | 111.2 | 95.8  | 115.6 | 3137.4  | <b>6 Fe</b>  | (Z)3-methoxy-3-oxoprop-1-enyl |
| 42 | KUWRIE | Pa-3               | 21.5 | 21.5 | 21.5 | 90.0  | 90.0  | 90.0  | 9899.6  | <b>6 Fe</b>  | Methyl                        |
| 43 | LIFGEN | P-1                | 13.1 | 16.9 | 17.0 | 66.4  | 74.4  | 74.8  | 3275.8  | <b>6 Fe</b>  | Methyl                        |
| 44 | LIFWED | P-1                | 12.2 | 14.9 | 14.9 | 70.6  | 78.1  | 72.7  | 2420.1  | <b>6 Fe</b>  | Methyl                        |
| 45 | LIFWIH | R-3c               | 17.0 | 17.0 | 62.2 | 90.0  | 90.0  | 120.0 | 15581.2 | <b>6 Mn</b>  | Methyl                        |
| 46 | MEGFIN | I4 <sub>1</sub> /a | 40.4 | 40.4 | 17.8 | 90.0  | 90.0  | 90.0  | 29004.6 | <b>6 Mn</b>  | Methyl                        |
| 47 | MONBEX | P-1                | 18.2 | 19.8 | 23.1 | 75.0  | 69.1  | 79.2  | 7433.1  | <b>8 Mn</b>  | prop-1-en-2-yl                |
| 48 | MONBIB | P-1                | 16.2 | 16.7 | 26.5 | 80.1  | 76.9  | 68.2  | 6492.5  | <b>6 Mn</b>  | Benzyl                        |
| 49 | MOPLAF | C2/c               | 30.7 | 14.2 | 25.3 | 90.0  | 118.9 | 90.0  | 9634.0  | <b>6 Fe</b>  | 3-methoxy-3-oxoprop-1-enyl    |
| 50 | NARCIU | P-1                | 14.5 | 14.8 | 27.1 | 85.5  | 89.1  | 73.2  | 5524.0  | <b>6 Fe</b>  | 4-methoxy-4-oxobutyl          |
| 51 | NAZPUB | P-1                | 13.1 | 16.9 | 17.0 | 66.4  | 74.4  | 74.8  | 3275.8  | <b>6 Fe</b>  | Methyl                        |
| 52 | NETWUF | P-1                | 12.8 | 15.3 | 17.5 | 69.1  | 71.8  | 76.6  | 2997.8  | <b>6 Mn</b>  | Methyl                        |
| 53 | NETXAM | P-1                | 15.6 | 20.3 | 21.5 | 99.6  | 106.7 | 101.3 | 6236.6  | <b>10 Mn</b> | Phenyl                        |
| 54 | NITGON | P2 <sub>1</sub> /n | 16.9 | 27.3 | 16.9 | 90.0  | 107.1 | 90.0  | 7481.6  | <b>6 Ga</b>  | (E)-styryl                    |
| 55 | NITGUT | P4/n               | 39.1 | 39.1 | 14.6 | 90.0  | 90.0  | 90.0  | 22287.5 | <b>16 Mn</b> | (E)-styryl                    |
| 56 | NOLJII | R-3                | 29.0 | 29.0 | 26.7 | 90.0  | 90.0  | 120.0 | 19524.1 | <b>12 Mn</b> | 2,6-dimethoxyphenyl           |
| 57 | OPOFEF | C2/c               | 64.0 | 14.4 | 29.5 | 90.0  | 108.5 | 90.0  | 25708.4 | <b>6 Mn</b>  | Eethyl                        |
| 58 | OYURAC | P-1                | 14.8 | 18.7 | 22.0 | 83.3  | 73.0  | 89.1  | 5759.4  | <b>10 Mn</b> | 4-isopropyl-Phenyl            |
| 59 | PORTIA | P-1                | 14.7 | 21.6 | 22.5 | 64.8  | 76.6  | 82.2  | 6285.1  | <b>12 Mn</b> | (E)-but-1-enyl                |
| 60 | PORTOG | P2 <sub>1</sub> /n | 14.5 | 14.7 | 62.9 | 90.0  | 92.3  | 90.0  | 13364.4 | <b>8 Mn</b>  | (E)-but-1-enyl                |



|    |         |                    |      |      |      |       |       |       |         |              |                     |
|----|---------|--------------------|------|------|------|-------|-------|-------|---------|--------------|---------------------|
| 61 | PORTUM  | P-1                | 15.5 | 19.1 | 28.0 | 109.8 | 94.7  | 102.4 | 7499.1  | <b>8 Mn</b>  | (E)-but-1-enyl      |
| 62 | QEVBAU  | P-1                | 14.5 | 18.2 | 21.4 | 76.6  | 74.2  | 86.0  | 5286.9  | <b>10 Mn</b> | Phenyl              |
| 63 | QEVBEY  | P-1                | 14.7 | 18.9 | 21.1 | 71.2  | 77.1  | 84.8  | 5406.0  | <b>10 Fe</b> | Phenyl              |
| 64 | QISDEC  | Cc                 | 49.3 | 19.9 | 36.6 | 90.0  | 127.1 | 90.0  | 28660.0 | <b>6 Ga</b>  | Cyclopentyl         |
| 65 | QOJQEL  | P-1                | 12.9 | 14.6 | 16.0 | 63.9  | 73.8  | 76.5  | 2565.7  | <b>6 Mn</b>  | Methyl              |
| 66 | QOJQIP  | P-1                | 13.0 | 14.7 | 16.2 | 110.6 | 94.9  | 109.4 | 2672.3  | <b>6 Mn</b>  | Ethyl               |
| 67 | QOJQOV  | P-1                | 14.7 | 15.7 | 16.2 | 61.7  | 81.5  | 75.8  | 3189.5  | <b>6 Mn</b>  | n-pentyl            |
| 68 | QOJQUB  | P-1                | 16.4 | 28.1 | 28.6 | 118.8 | 93.7  | 100.9 | 11185.0 | <b>6 Mn</b>  | n-hexanyl           |
| 69 | SAKSIH  | R-3                | 23.7 | 23.7 | 38.3 | 90.0  | 90.0  | 120.0 | 18626.6 | <b>12 Mn</b> | (E)-but-1-enyl      |
| 70 | SATVAL  | R-3                | 18.2 | 18.2 | 31.9 | 90.0  | 90.0  | 120.0 | 9146.9  | <b>6 Mn</b>  | 2-Methylpropyl      |
| 71 | SATVEP  | P-1                | 14.5 | 15.1 | 16.0 | 62.1  | 81.7  | 85.7  | 3048.3  | <b>6 Mn</b>  | Benzyl              |
| 72 | SATVIT  | P-1                | 20.2 | 23.6 | 36.4 | 91.4  | 100.8 | 111.0 | 15815.0 | <b>8 Mn</b>  | Isopropyl           |
| 73 | SATVOZ  | C2/c               | 39.0 | 20.7 | 28.1 | 90.0  | 118.2 | 90.0  | 20041.8 | <b>10 Mn</b> | Isobutyl            |
| 74 | SATVUF  | P2 <sub>1</sub> /n | 21.4 | 25.1 | 22.8 | 90.0  | 108.6 | 90.0  | 11645.3 | <b>10 Mn</b> | t-butyl             |
| 75 | SATWAM  | R-3c               | 18.4 | 18.4 | 64.8 | 90.0  | 90.0  | 120.0 | 19002.6 | <b>6 Mn</b>  | 2,2-dimethyl propyl |
| 76 | SAZPAL  | C2/c               | 39.2 | 20.5 | 28.3 | 90.0  | 118.8 | 90.0  | 19913.1 | <b>10 Mn</b> | Isobutyl            |
| 77 | SEKKOJ  | R-3c               | 16.3 | 16.3 | 64.1 | 90.0  | 90.0  | 120.0 | 14721.3 | <b>6 Mn</b>  | Methyl              |
| 78 | SULRUN  | P-1                | 11.0 | 17.0 | 17.1 | 64.5  | 86.8  | 71.3  | 2715.5  | <b>6 Mn</b>  | Ethyl               |
| 79 | TARKEE  | P-1                | 12.2 | 14.9 | 15.0 | 69.7  | 78.0  | 73.3  | 2423.2  | <b>6 Fe</b>  | Methyl              |
| 80 | UJOSUH  | R-3                | 24.8 | 24.8 | 11.3 | 90.0  | 90.0  | 120.0 | 6000.5  | <b>6 Mn</b>  | Methyl              |
| 81 | UJOTAO  | R-3                | 26.6 | 26.6 | 23.3 | 90.0  | 90.0  | 120.0 | 14307.3 | <b>6 Mn</b>  | Methyl              |
| 82 | UWEJEM  | P2 <sub>1</sub> /c | 13.0 | 28.2 | 34.7 | 90.0  | 99.8  | 90.0  | 12561.0 | <b>10 Mn</b> | cyclohexenyl        |
| 83 | VIYFEP  | P-1                | 18.2 | 18.3 | 23.4 | 94.3  | 106.2 | 119.5 | 6292.1  | <b>6 Fe</b>  | ethenyl             |
| 84 | VUHGVOV | C2/c               | 16.7 | 28.7 | 23.7 | 90.0  | 100.2 | 90.0  | 11148.3 | <b>6 Mn</b>  | Ethyl               |

|     |        |                    |      |      |      |      |      |       |         |             |          |
|-----|--------|--------------------|------|------|------|------|------|-------|---------|-------------|----------|
| 85  | VUHGUB | P4/ncc             | 27.0 | 27.0 | 29.2 | 90.0 | 90.0 | 90.0  | 21237.3 | <b>8 Mn</b> | Ethyl    |
| 86  | WUFWOK | P-1                | 16.4 | 17.0 | 21.6 | 67.8 | 87.1 | 63.9  | 4928.5  | <b>6 Mn</b> | Methyl   |
| 87  | XAKYUE | I4 <sub>1</sub> /a | 40.6 | 40.6 | 17.6 | 90.0 | 90.0 | 90.0  | 29086.1 | <b>6 Mn</b> | Ethyl    |
| 88  | XAKZAL | I4 <sub>1</sub> /a | 40.7 | 40.7 | 17.5 | 90.0 | 90.0 | 90.0  | 28937.4 | <b>6 Mn</b> | n-pentyl |
| 89  | XAKZEP | I4 <sub>1</sub> /a | 39.9 | 39.9 | 17.8 | 90.0 | 90.0 | 90.0  | 28188.6 | <b>6 Mn</b> | Methyl   |
| 90  | XAKZIT | I4 <sub>1</sub> /a | 39.9 | 39.9 | 18.0 | 90.0 | 90.0 | 90.0  | 28731.8 | <b>6 Mn</b> | Methyl   |
| 91  | XAKZOZ | I4 <sub>1</sub> /a | 40.2 | 40.2 | 17.8 | 90.0 | 90.0 | 90.0  | 28734.5 | <b>6 Mn</b> | Methyl   |
| 92  | XAKZUF | I4 <sub>1</sub> /a | 40.7 | 40.7 | 17.5 | 90.0 | 90.0 | 90.0  | 28948.4 | <b>6 Mn</b> | Ethyl    |
| 93  | XALBAO | I4 <sub>1</sub> /a | 40.4 | 40.4 | 17.6 | 90.0 | 90.0 | 90.0  | 28638.1 | <b>6 Mn</b> | Ethyl    |
| 94  | XALBES | I4 <sub>1</sub> /a | 40.3 | 40.3 | 17.6 | 90.0 | 90.0 | 90.0  | 28592.9 | <b>6 Mn</b> | Ethyl    |
| 95  | XALBIW | I4 <sub>1</sub> /a | 40.7 | 40.7 | 17.6 | 90.0 | 90.0 | 90.0  | 29020.5 | <b>6 Mn</b> | Ethyl    |
| 96  | XALBOC | I4 <sub>1</sub> /a | 40.5 | 40.5 | 17.6 | 90.0 | 90.0 | 90.0  | 28935.6 | <b>6 Mn</b> | Ethyl    |
| 97  | XALBUI | I4 <sub>1</sub> /a | 40.4 | 40.4 | 17.8 | 90.0 | 90.0 | 90.0  | 29111.1 | <b>6 Mn</b> | Ethyl    |
| 98  | XALCAP | I4 <sub>1</sub> /a | 40.6 | 40.6 | 17.4 | 90.0 | 90.0 | 90.0  | 28716.0 | <b>6 Mn</b> | Ethyl    |
| 99  | XALCET | I4 <sub>1</sub> /a | 41.0 | 41.0 | 17.2 | 90.0 | 90.0 | 90.0  | 28867.1 | <b>6 Mn</b> | Ethyl    |
| 100 | XALCIX | I4 <sub>1</sub> /a | 40.9 | 40.9 | 17.3 | 90.0 | 90.0 | 90.0  | 28939.7 | <b>6 Mn</b> | n-pentyl |
| 101 | XALCOD | I4 <sub>1</sub> /a | 40.9 | 40.9 | 17.5 | 90.0 | 90.0 | 90.0  | 29212.1 | <b>6 Mn</b> | n-pentyl |
| 102 | XALCUJ | I4 <sub>1</sub> /a | 40.9 | 40.9 | 17.4 | 90.0 | 90.0 | 90.0  | 29104.2 | <b>6 Mn</b> | n-pentyl |
| 103 | XALDAQ | I4 <sub>1</sub> /a | 40.8 | 40.8 | 17.4 | 90.0 | 90.0 | 90.0  | 29023.3 | <b>6 Mn</b> | n-pentyl |
| 104 | XALDEU | I4 <sub>1</sub> /a | 40.7 | 40.7 | 17.2 | 90.0 | 90.0 | 90.0  | 28481.5 | <b>6 Mn</b> | n-pentyl |
| 105 | XALDIY | I4 <sub>1</sub> /a | 40.7 | 40.7 | 17.4 | 90.0 | 90.0 | 90.0  | 28698.0 | <b>6 Mn</b> | n-pentyl |
| 106 | XALDOE | I4 <sub>1</sub> /a | 40.9 | 40.9 | 17.5 | 90.0 | 90.0 | 90.0  | 29234.4 | <b>6 Mn</b> | n-pentyl |
| 107 | YIGDUO | P-1                | 12.8 | 15.3 | 17.7 | 68.7 | 70.7 | 76.0  | 3018.6  | <b>6 Mn</b> | Methyl   |
| 108 | YUMGUJ | R-3                | 32.3 | 32.3 | 11.3 | 90.0 | 90.0 | 120.0 | 10211.2 | <b>6 Mn</b> | Methyl   |

**Table S2 Crystal parameters of compound 1-4.**

| Complex                                               | 1                                                                                               | 2                                                                                               | 3                                                                                                   | 4                                                                                                  |
|-------------------------------------------------------|-------------------------------------------------------------------------------------------------|-------------------------------------------------------------------------------------------------|-----------------------------------------------------------------------------------------------------|----------------------------------------------------------------------------------------------------|
| Formula                                               | C <sub>62</sub> H <sub>88</sub> Cl <sub>4</sub> Fe <sub>4</sub> N <sub>16</sub> O <sub>24</sub> | C <sub>62</sub> H <sub>88</sub> Br <sub>4</sub> Fe <sub>4</sub> N <sub>16</sub> O <sub>24</sub> | C <sub>117</sub> H <sub>106</sub> Cl <sub>10</sub> Mn <sub>10</sub> N <sub>26</sub> O <sub>38</sub> | C <sub>100</sub> H <sub>65</sub> Br <sub>10</sub> Mn <sub>10</sub> N <sub>21</sub> O <sub>39</sub> |
| Formula weight                                        | 1806.68                                                                                         | 1984.52                                                                                         | 3388.17                                                                                             | 3832.77                                                                                            |
| Temperature( K)                                       | 150(2)                                                                                          | 150(2)                                                                                          | 150(2)                                                                                              | 150(2)                                                                                             |
| Crystalsyst                                           | Tetragonal                                                                                      | Tetragonal                                                                                      | Triclinic                                                                                           | Triclinic                                                                                          |
| Space group                                           | <i>I</i> 4 <sub>1</sub> /a                                                                      | <i>I</i> 4 <sub>1</sub> /a                                                                      | <i>P</i> $\bar{1}$                                                                                  | <i>P</i> $\bar{1}$                                                                                 |
| <i>a</i> (Å)                                          | 26.284(3)                                                                                       | 26.292(5)                                                                                       | 20.032(3)                                                                                           | 20.239(9)                                                                                          |
| <i>b</i> (Å)                                          | 26.284(3)                                                                                       | 26.292(5)                                                                                       | 21.900(3)                                                                                           | 21.285(9)                                                                                          |
| <i>c</i> (Å)                                          | 12.9228(15)                                                                                     | 12.959(2)                                                                                       | 27.421(4)                                                                                           | 26.335(11)                                                                                         |
| $\alpha$ (°)                                          | 90°                                                                                             | 90°                                                                                             | 113.261(2)                                                                                          | 113.598(6)                                                                                         |
| $\beta$ (°)                                           | 90°                                                                                             | 90°                                                                                             | 92.344(3)                                                                                           | 91.571(7)                                                                                          |
| $\gamma$ (°)                                          | 90°                                                                                             | 90°                                                                                             | 96.129(2)                                                                                           | 95.727(6)                                                                                          |
| <i>V</i> (Å <sup>3</sup> )                            | 8928(2)                                                                                         | 8958(3)                                                                                         | 10943(2)                                                                                            | 10316(8)                                                                                           |
| <i>Z</i>                                              | 4                                                                                               | 4                                                                                               | 2                                                                                                   | 2                                                                                                  |
| $\mu$ (mm <sup>-1</sup> )                             | 0.830                                                                                           | 2.492                                                                                           | 0.728                                                                                               | 2.585                                                                                              |
| GOF on <i>F</i> <sup>2</sup>                          | 1.035                                                                                           | 1.011                                                                                           | 1.028                                                                                               | 1.234                                                                                              |
| Final R indices [ <i>I</i> > 2 $\sigma$ ( <i>I</i> )] | <i>R</i> <sub>1</sub> = 0.0603<br><i>wR</i> <sub>2</sub> = 0.1735                               | <i>R</i> <sub>1</sub> = 0.0577<br><i>wR</i> <sub>2</sub> = 0.1470                               | <i>R</i> <sub>1</sub> = 0.0706<br><i>wR</i> <sub>2</sub> = 0.1595                                   | <i>R</i> <sub>1</sub> = 0.0989<br><i>wR</i> <sub>2</sub> = 0.2351                                  |

**Table S3 Some selected bond lengths (Å) and angles (°) in 1-4.**

| Compound 1                                                           |            |                                        |            |
|----------------------------------------------------------------------|------------|----------------------------------------|------------|
| Fe1-O1                                                               | 1.897(3)   | Fe1-N1                                 | 2.053(3)   |
| Fe1-O2 <sup>#1</sup>                                                 | 2.034(3)   | Fe1-O4                                 | 2.055(3)   |
| Fe1-O3                                                               | 2.043(3)   | Fe1-N2 <sup>#1</sup>                   | 2.110(4)   |
| O1-Fe1-O2 <sup>#1</sup>                                              | 114.80(13) | O3-Fe1-O4                              | 87.63(14)  |
| O1-Fe1-O3                                                            | 159.59(13) | N1-Fe1-O4                              | 102.71(14) |
| O2 <sup>#1</sup> -Fe1-O3                                             | 85.21(12)  | O1-Fe1-N2 <sup>#1</sup>                | 97.53(15)  |
| O1-Fe1-N1                                                            | 85.88(13)  | O2 <sup>#1</sup> -Fe1-N2 <sup>#1</sup> | 75.55(13)  |
| O2 <sup>#1</sup> -Fe1-N1                                             | 158.15(13) | O3-Fe1-N2 <sup>#1</sup>                | 91.15(13)  |
| O3-Fe1-N1                                                            | 74.87(13)  | N1-Fe1-N2 <sup>#1</sup>                | 95.65(13)  |
| O1-Fe1-O4                                                            | 90.11(15)  | O4-Fe1-N2 <sup>#1</sup>                | 160.58(14) |
| Symmetry code: #1: 5/4 - <i>y</i> , <i>x</i> - 3/4, 1/4 - <i>z</i> . |            |                                        |            |
| Compound 2                                                           |            |                                        |            |
| Fe1-O1 <sup>#1</sup>                                                 | 1.893(3)   | Fe1-O4                                 | 2.049(3)   |
| Fe1-O2                                                               | 2.036(3)   | Fe1-N1 <sup>#1</sup>                   | 2.056(3)   |
| Fe1-O3 <sup>#1</sup>                                                 | 2.038(3)   | Fe1-N2                                 | 2.113(3)   |
| O1-Fe1-O2 <sup>#1</sup>                                              | 114.80(13) | O3-Fe1-O4                              | 87.63(14)  |
| O1-Fe1-O3                                                            | 159.59(13) | N1-Fe1-O4                              | 102.71(14) |

|                          |            |                                        |           |
|--------------------------|------------|----------------------------------------|-----------|
| O2 <sup>#1</sup> -Fe1-O3 | 85.21(12)  | O1-Fe1-N2 <sup>#1</sup>                | 97.53(15) |
| O1-Fe1-N1                | 85.88(13)  | O2 <sup>#1</sup> -Fe1-N2 <sup>#1</sup> | 75.55(13) |
| O2 <sup>#1</sup> -Fe1-N1 | 158.15(13) | O3-Fe1-N2 <sup>#1</sup>                | 91.15(13) |
| O3-Fe1-N1                | 74.87(13)  | N1-Fe1-N2 <sup>#1</sup>                | 95.65(13) |

Symmetry code: #1:  $5/4 - y, x - 3/4, 1/4 - z$ .

---

Compound **3**

---

|             |            |             |            |
|-------------|------------|-------------|------------|
| Mn1-O1A     | 1.859(4)   | Mn6-O6A     | 1.850(4)   |
| Mn1-O3A     | 1.895(4)   | Mn6-O4A     | 1.886(4)   |
| Mn1-N1A     | 1.950(5)   | Mn6-N4A     | 1.944(4)   |
| Mn1-O5B     | 1.969(4)   | Mn6-O5D     | 1.983(4)   |
| Mn1-N3B     | 2.231(5)   | Mn6-N3D     | 2.247(5)   |
| Mn1-N1S     | 2.276(4)   | Mn6-N1T     | 2.292(5)   |
| Mn2-O6B     | 1.850(3)   | Mn7-O6D     | 1.876(4)   |
| Mn2-O4B     | 1.943(4)   | Mn7-O4D     | 1.935(4)   |
| Mn2-N4B     | 1.949(4)   | Mn7-N4D     | 1.950(5)   |
| Mn2-O2C     | 1.982(3)   | Mn7-O5E     | 1.954(4)   |
| Mn2-O1F     | 2.197(4)   | Mn7-O3F     | 2.209(4)   |
| Mn2-N2C     | 2.271(5)   | Mn7-N3E     | 2.279(5)   |
| Mn3-O1C     | 1.864(4)   | Mn8-O6E     | 1.879(4)   |
| Mn3-N1C     | 1.923(4)   | Mn8-O4E     | 1.922(4)   |
| Mn3-O3C     | 1.931(3)   | Mn8-N4E     | 1.931(5)   |
| Mn3-O2B     | 1.958(4)   | Mn8-O2D     | 1.958(4)   |
| Mn3-O2F     | 2.265(4)   | Mn8-O4F     | 2.238(5)   |
| Mn3-N2B     | 2.313(5)   | Mn8-N2D     | 2.315(5)   |
| Mn4-O1B     | 1.842(4)   | Mn9-O1D     | 1.850(4)   |
| Mn4-O3B     | 1.919(4)   | Mn9-O3D     | 1.917(4)   |
| Mn4-N1B     | 1.950(4)   | Mn9-N1D     | 1.938(5)   |
| Mn4-O5C     | 1.970(4)   | Mn9-O2E     | 1.962(4)   |
| Mn4-O1U     | 2.275(5)   | Mn9-O1V     | 2.226(6)   |
| Mn4-N3C     | 2.295(4)   | Mn9-N2E     | 2.312(5)   |
| Mn5-O6C     | 1.855(4)   | Mn10-O1E    | 1.862(4)   |
| Mn5-N4C     | 1.931(4)   | Mn10-O3E    | 1.925(4)   |
| Mn5-O4C     | 1.932(3)   | Mn10-N1E    | 1.926(5)   |
| Mn5-O5A     | 1.949(4)   | Mn10-O2A    | 1.947(4)   |
| Mn5-O1X     | 2.288(4)   | Mn10-O1W    | 2.306(4)   |
| Mn5-N3A     | 2.410(5)   | Mn10-N2A    | 2.393(4)   |
| O1A-Mn1-O3A | 171.52(19) | O6A-Mn6-O4A | 171.26(19) |
| O1A-Mn1-N1A | 91.6(2)    | O6A-Mn6-N4A | 92.2(2)    |
| O3A-Mn1-N1A | 79.87(19)  | O4A-Mn6-N4A | 79.06(18)  |
| O1A-Mn1-O5B | 93.16(19)  | O6A-Mn6-O5D | 92.46(19)  |
| O3A-Mn1-O5B | 95.33(17)  | O4A-Mn6-O5D | 96.26(17)  |
| N1A-Mn1-O5B | 175.2(2)   | N4A-Mn6-O5D | 175.32(18) |

|             |            |             |            |
|-------------|------------|-------------|------------|
| O1A-Mn1-N3B | 92.99(18)  | O6A-Mn6-N3D | 92.65(18)  |
| O3A-Mn1-N3B | 89.40(15)  | O4A-Mn6-N3D | 89.17(16)  |
| N1A-Mn1-N3B | 105.45(18) | N4A-Mn6-N3D | 104.76(18) |
| O5B-Mn1-N3B | 74.69(16)  | O5D-Mn6-N3D | 74.72(17)  |
| O1A-Mn1-N1S | 90.2(2)    | O6A-Mn6-N1T | 89.8(2)    |
| O3A-Mn1-N1S | 90.11(18)  | O4A-Mn6-N1T | 91.22(18)  |
| N1A-Mn1-N1S | 92.65(19)  | N4A-Mn6-N1T | 93.68(18)  |
| O5B-Mn1-N1S | 86.95(17)  | O5D-Mn6-N1T | 86.64(18)  |
| N3B-Mn1-N1S | 161.50(19) | N3D-Mn6-N1T | 161.28(19) |
| O6B-Mn2-O4B | 169.82(16) | O6D-Mn7-O4D | 170.03(18) |
| O6B-Mn2-N4B | 90.05(17)  | O6D-Mn7-N4D | 89.9(2)    |
| O4B-Mn2-N4B | 80.05(17)  | O4D-Mn7-N4D | 80.30(18)  |
| O6B-Mn2-O2C | 100.88(15) | O6D-Mn7-O5E | 100.66(18) |
| O4B-Mn2-O2C | 88.87(16)  | O4D-Mn7-O5E | 89.02(17)  |
| N4B-Mn2-O2C | 168.53(17) | N4D-Mn7-O5E | 169.19(19) |
| O6B-Mn2-O1F | 91.17(16)  | O6D-Mn7-O3F | 91.02(19)  |
| O4B-Mn2-O1F | 92.15(16)  | O4D-Mn7-O3F | 91.80(17)  |
| N4B-Mn2-O1F | 95.67(16)  | N4D-Mn7-O3F | 94.66(18)  |
| O2C-Mn2-O1F | 87.63(15)  | O5E-Mn7-O3F | 87.32(18)  |
| O6B-Mn2-N2C | 92.59(16)  | O6D-Mn7-N3E | 92.38(18)  |
| O4B-Mn2-N2C | 87.16(15)  | O4D-Mn7-N3E | 87.73(16)  |
| N4B-Mn2-N2C | 101.73(17) | N4D-Mn7-N3E | 102.19(18) |
| O2C-Mn2-N2C | 74.56(15)  | O5E-Mn7-N3E | 75.49(17)  |
| O1F-Mn2-N2C | 162.19(15) | O3F-Mn7-N3E | 162.81(17) |
| O1C-Mn3-N1C | 90.23(18)  | O6E-Mn8-O4E | 169.76(19) |
| O1C-Mn3-O3C | 169.45(17) | O6E-Mn8-N4E | 89.9(2)    |
| N1C-Mn3-O3C | 79.23(17)  | O4E-Mn8-N4E | 79.9(2)    |
| O1C-Mn3-O2B | 98.55(16)  | O6E-Mn8-O2D | 98.31(17)  |
| N1C-Mn3-O2B | 170.78(17) | O4E-Mn8-O2D | 91.91(18)  |
| O3C-Mn3-O2B | 92.01(16)  | N4E-Mn8-O2D | 171.49(19) |
| O1C-Mn3-O2F | 91.49(19)  | O6E-Mn8-O4F | 91.8(2)    |
| N1C-Mn3-O2F | 96.85(18)  | O4E-Mn8-O4F | 89.31(19)  |
| O3C-Mn3-O2F | 89.31(17)  | N4E-Mn8-O4F | 95.62(19)  |
| O2B-Mn3-O2F | 85.80(17)  | O2D-Mn8-O4F | 86.42(19)  |
| O1C-Mn3-N2B | 98.57(16)  | O6E-Mn8-N2D | 98.47(18)  |
| N1C-Mn3-N2B | 102.61(18) | O4E-Mn8-N2D | 83.86(16)  |
| O3C-Mn3-N2B | 84.36(15)  | N4E-Mn8-N2D | 102.89(19) |
| O2B-Mn3-N2B | 73.41(17)  | O2D-Mn8-N2D | 73.79(17)  |
| O2F-Mn3-N2B | 157.98(18) | O4F-Mn8-N2D | 158.8(2)   |
| O1B-Mn4-O3B | 170.62(17) | O1D-Mn9-O3D | 170.34(18) |
| O1B-Mn4-N1B | 90.50(19)  | O1D-Mn9-N1D | 89.9(2)    |
| O3B-Mn4-N1B | 80.13(18)  | O3D-Mn9-N1D | 80.49(19)  |
| O1B-Mn4-O5C | 92.50(17)  | O1D-Mn9-O2E | 92.68(17)  |
| O3B-Mn4-O5C | 96.88(16)  | O3D-Mn9-O2E | 96.91(16)  |

|             |            |              |            |
|-------------|------------|--------------|------------|
| N1B-Mn4-O5C | 176.93(19) | N1D-Mn9-O2E  | 177.4(2)   |
| O1B-Mn4-O1U | 92.26(19)  | O1D-Mn9-O1V  | 91.9(2)    |
| O3B-Mn4-O1U | 88.17(17)  | O3D-Mn9-O1V  | 90.02(19)  |
| N1B-Mn4-O1U | 94.70(16)  | N1D-Mn9-O1V  | 94.08(19)  |
| O5C-Mn4-O1U | 85.83(16)  | O2E-Mn9-O1V  | 86.12(18)  |
| O1B-Mn4-N3C | 92.50(17)  | O1D-Mn9-N2E  | 91.74(18)  |
| O3B-Mn4-N3C | 90.33(15)  | O3D-Mn9-N2E  | 89.76(15)  |
| N1B-Mn4-N3C | 105.11(16) | N1D-Mn9-N2E  | 105.79(19) |
| O5C-Mn4-N3C | 74.13(15)  | O2E-Mn9-N2E  | 73.86(17)  |
| O1U-Mn4-N3C | 159.58(16) | O1V-Mn9-N2E  | 159.80(18) |
| O6C-Mn5-N4C | 90.29(17)  | O1E-Mn10-O3E | 169.15(18) |
| O6C-Mn5-O4C | 169.45(15) | O1E-Mn10-N1E | 90.9(2)    |
| N4C-Mn5-O4C | 80.11(16)  | O3E-Mn10-N1E | 79.10(18)  |
| O6C-Mn5-O5A | 96.14(16)  | O1E-Mn10-O2A | 96.96(18)  |
| N4C-Mn5-O5A | 167.29(17) | O3E-Mn10-O2A | 93.67(17)  |
| O4C-Mn5-O5A | 94.13(15)  | N1E-Mn10-O2A | 166.14(18) |
| O6C-Mn5-O1X | 97.81(16)  | O1E-Mn10-O1W | 98.26(16)  |
| N4C-Mn5-O1X | 88.88(16)  | O3E-Mn10-O1W | 85.49(15)  |

| Compound 4 |           |         |           |
|------------|-----------|---------|-----------|
| Mn1-O3A    | 1.852(12) | Mn6-O6A | 1.843(13) |
| Mn1-O1A    | 1.912(12) | Mn6-O4A | 1.867(12) |
| Mn1-N1A    | 1.929(17) | Mn6-N4A | 1.947(13) |
| Mn1-O5B    | 1.937(15) | Mn6-O5D | 2.027(12) |
| Mn1-N1S    | 2.199(16) | Mn6-N3D | 2.242(16) |
| Mn1-N3B    | 2.216(16) | Mn6-N1T | 2.248(11) |
| Mn2-O6B    | 1.857(13) | Mn7-O6D | 1.921(14) |
| Mn2-O2C    | 1.956(10) | Mn7-O5E | 1.945(12) |
| Mn2-O4B    | 1.964(13) | Mn7-N4D | 1.949(17) |
| Mn2-N4B    | 1.964(15) | Mn7-O4D | 1.957(11) |
| Mn2-O1F    | 2.190(12) | Mn7-O3F | 2.112(13) |
| Mn2-N2C    | 2.341(17) | Mn7-N3E | 2.217(17) |
| Mn3-O1C    | 1.858(10) | Mn8-O6E | 1.899(11) |
| Mn3-O3C    | 1.901(11) | Mn8-N4E | 1.909(15) |
| Mn3-N1C    | 1.905(15) | Mn8-O2D | 1.932(12) |
| Mn3-O2B    | 1.933(10) | Mn8-O4E | 1.940(13) |
| Mn3-O2F    | 2.225(11) | Mn8-O4F | 2.171(13) |
| Mn3-N2B    | 2.271(15) | Mn8-N2D | 2.254(14) |
| Mn4-O1B    | 1.833(11) | Mn9-O1D | 1.844(12) |
| Mn4-O3B    | 1.919(10) | Mn9-O3D | 1.917(11) |
| Mn4-N1B    | 1.973(13) | Mn9-O2E | 1.942(11) |
| Mn4-O5C    | 1.993(11) | Mn9-N1D | 1.971(14) |
| Mn4-O1U    | 2.264(16) | Mn9-O1V | 2.237(15) |

|             |           |             |           |
|-------------|-----------|-------------|-----------|
| Mn4-N3C     | 2.267(16) | Mn9-N2E     | 2.267(15) |
| Mn5-O6C     | 1.854(11) | Mn10-O1E    | 1.820(12) |
| Mn5-N4C     | 1.897(13) | Mn10-N1E    | 1.895(14) |
| Mn5-O4C     | 1.906(10) | Mn10-O3E    | 1.946(11) |
| Mn5-O5A     | 1.911(11) | Mn10-O2A    | 1.982(13) |
| Mn5-O1X     | 2.303(12) | Mn10-O1W    | 2.218(13) |
| Mn5-N3A     | 2.327(13) | Mn10-N2A    | 2.346(16) |
| O3A-Mn1-O1A | 171.1(6)  | O4C-Mn5-N3A | 91.8(5)   |
| O3A-Mn1-N1A | 83.0(7)   | O5A-Mn5-N3A | 73.0(5)   |
| O1A-Mn1-N1A | 88.1(7)   | O1X-Mn5-N3A | 154.7(5)  |
| O3A-Mn1-O5B | 94.2(6)   | O6A-Mn6-O4A | 171.8(6)  |
| O1A-Mn1-O5B | 94.7(6)   | O6A-Mn6-N4A | 93.8(6)   |
| N1A-Mn1-O5B | 176.6(7)  | O4A-Mn6-N4A | 78.2(6)   |
| O3A-Mn1-N1S | 93.3(7)   | O6A-Mn6-O5D | 92.2(6)   |
| O1A-Mn1-N1S | 87.8(7)   | O4A-Mn6-O5D | 95.9(5)   |
| N1A-Mn1-N1S | 95.5(7)   | N4A-Mn6-O5D | 174.0(5)  |
| O5B-Mn1-N1S | 86.6(6)   | O6A-Mn6-N3D | 91.2(6)   |
| O3A-Mn1-N3B | 88.4(5)   | O4A-Mn6-N3D | 92.0(5)   |
| O1A-Mn1-N3B | 93.4(5)   | N4A-Mn6-N3D | 104.6(6)  |
| N1A-Mn1-N3B | 102.9(7)  | O5D-Mn6-N3D | 74.5(6)   |
| O5B-Mn1-N3B | 75.0(6)   | O6A-Mn6-N1T | 88.3(5)   |
| N1S-Mn1-N3B | 161.6(7)  | O4A-Mn6-N1T | 91.3(5)   |
| O3A-Mn1-C8A | 26.4(5)   | N4A-Mn6-N1T | 95.2(5)   |
| O1A-Mn1-C8A | 144.7(7)  | O5D-Mn6-N1T | 85.7(5)   |
| N1A-Mn1-C8A | 56.6(7)   | N3D-Mn6-N1T | 160.2(6)  |
| O5B-Mn1-C8A | 120.5(6)  | O6D-Mn7-O5E | 97.9(6)   |
| N1S-Mn1-C8A | 96.5(7)   | O6D-Mn7-N4D | 91.7(7)   |
| N3B-Mn1-C8A | 93.1(5)   | O5E-Mn7-N4D | 169.7(7)  |
| O6B-Mn2-O2C | 100.9(5)  | O6D-Mn7-O4D | 172.4(6)  |
| O6B-Mn2-O4B | 170.6(5)  | O5E-Mn7-O4D | 89.0(5)   |
| O2C-Mn2-O4B | 88.0(5)   | N4D-Mn7-O4D | 81.2(6)   |
| O6B-Mn2-N4B | 89.2(7)   | O6D-Mn7-O3F | 91.4(6)   |
| O2C-Mn2-N4B | 169.2(7)  | O5E-Mn7-O3F | 88.5(5)   |
| O4B-Mn2-N4B | 81.7(7)   | N4D-Mn7-O3F | 95.2(6)   |
| O6B-Mn2-O1F | 89.5(5)   | O4D-Mn7-O3F | 92.0(5)   |
| O2C-Mn2-O1F | 91.3(5)   | O6D-Mn7-N3E | 92.5(6)   |
| O4B-Mn2-O1F | 93.2(5)   | O5E-Mn7-N3E | 74.0(5)   |
| N4B-Mn2-O1F | 92.5(5)   | N4D-Mn7-N3E | 101.9(6)  |
| O6B-Mn2-N2C | 93.7(5)   | O4D-Mn7-N3E | 86.2(5)   |
| O2C-Mn2-N2C | 74.0(5)   | O3F-Mn7-N3E | 162.4(6)  |
| O4B-Mn2-N2C | 85.9(5)   | O6E-Mn8-N4E | 91.4(6)   |
| N4B-Mn2-N2C | 102.0(6)  | O6E-Mn8-O2D | 98.1(5)   |
| O1F-Mn2-N2C | 165.2(5)  | N4E-Mn8-O2D | 170.4(6)  |
| O1C-Mn3-O3C | 169.9(5)  | O6E-Mn8-O4E | 170.9(6)  |

|             |          |              |          |
|-------------|----------|--------------|----------|
| O1C-Mn3-N1C | 90.1(6)  | N4E-Mn8-O4E  | 79.6(7)  |
| O3C-Mn3-N1C | 80.1(6)  | O2D-Mn8-O4E  | 90.8(6)  |
| O1C-Mn3-O2B | 100.4(5) | O6E-Mn8-O4F  | 92.7(5)  |
| O3C-Mn3-O2B | 89.5(5)  | N4E-Mn8-O4F  | 97.5(6)  |
| N1C-Mn3-O2B | 169.5(5) | O2D-Mn8-O4F  | 83.9(6)  |
| O1C-Mn3-O2F | 91.6(5)  | O4E-Mn8-O4F  | 90.3(5)  |
| O3C-Mn3-O2F | 91.7(5)  | O6E-Mn8-N2D  | 96.8(5)  |
| N1C-Mn3-O2F | 97.4(6)  | N4E-Mn8-N2D  | 105.5(6) |
| O2B-Mn3-O2F | 83.3(4)  | O2D-Mn8-N2D  | 71.8(5)  |
| O1C-Mn3-N2B | 97.5(5)  | O4E-Mn8-N2D  | 84.0(5)  |
| O3C-Mn3-N2B | 82.7(5)  | O4F-Mn8-N2D  | 154.9(6) |
| N1C-Mn3-N2B | 102.4(6) | O1D-Mn9-O3D  | 170.5(5) |
| O2B-Mn3-N2B | 75.5(5)  | O1D-Mn9-O2E  | 92.4(5)  |
| O2F-Mn3-N2B | 158.1(5) | O3D-Mn9-O2E  | 97.1(5)  |
| O1B-Mn4-O3B | 171.5(5) | O1D-Mn9-N1D  | 90.9(6)  |
| O1B-Mn4-N1B | 91.0(5)  | O3D-Mn9-N1D  | 79.6(5)  |
| O3B-Mn4-N1B | 80.7(5)  | O2E-Mn9-N1D  | 176.6(6) |
| O1B-Mn4-O5C | 91.6(5)  | O1D-Mn9-O1V  | 96.3(6)  |
| O3B-Mn4-O5C | 96.7(5)  | O3D-Mn9-O1V  | 84.2(5)  |
| N1B-Mn4-O5C | 177.4(6) | O2E-Mn9-O1V  | 86.9(5)  |
| O1B-Mn4-O1U | 91.4(5)  | N1D-Mn9-O1V  | 92.9(6)  |
| O3B-Mn4-O1U | 87.7(5)  | O1D-Mn9-N2E  | 93.4(6)  |
| N1B-Mn4-O1U | 96.0(5)  | O3D-Mn9-N2E  | 89.1(5)  |
| O5C-Mn4-O1U | 83.6(5)  | O2E-Mn9-N2E  | 75.2(5)  |
| O1B-Mn4-N3C | 92.8(5)  | N1D-Mn9-N2E  | 104.5(6) |
| O3B-Mn4-N3C | 91.0(5)  | O1V-Mn9-N2E  | 160.0(5) |
| N1B-Mn4-N3C | 104.3(6) | O1E-Mn10-N1E | 91.8(6)  |
| O5C-Mn4-N3C | 75.8(6)  | O1E-Mn10-O3E | 169.2(5) |
| O1U-Mn4-N3C | 159.1(5) | N1E-Mn10-O3E | 80.4(6)  |
| O6C-Mn5-N4C | 91.4(5)  | O1E-Mn10-O2A | 96.8(6)  |
| O6C-Mn5-O4C | 168.8(5) | N1E-Mn10-O2A | 166.5(6) |
| N4C-Mn5-O4C | 79.1(5)  | O3E-Mn10-O2A | 92.3(5)  |
| O6C-Mn5-O5A | 97.3(5)  | O1E-Mn10-O1W | 97.4(5)  |
| N4C-Mn5-O5A | 166.0(5) | N1E-Mn10-O1W | 86.7(6)  |
| O4C-Mn5-O5A | 93.2(5)  | O3E-Mn10-O1W | 89.7(5)  |
| O6C-Mn5-O1X | 95.0(5)  | O2A-Mn10-O1W | 81.9(5)  |
| N4C-Mn5-O1X | 86.6(5)  | O1E-Mn10-N2A | 89.3(5)  |
| O4C-Mn5-O1X | 90.5(4)  | N1E-Mn10-N2A | 118.6(6) |
| O5A-Mn5-O1X | 81.7(5)  | O3E-Mn10-N2A | 87.9(5)  |
| O6C-Mn5-N3A | 87.4(5)  | O2A-Mn10-N2A | 72.1(6)  |
| N4C-Mn5-N3A | 118.6(5) | O1W-Mn10-N2A | 153.8(6) |



**Table S4 Hydrogen-bonding parameters of 1-2 (Å, °).**

| D-H...A                     | $d_{D-H}$ | $d_{H...A}$ | $d_{D...A}$ | $\angle(DHA)$ |
|-----------------------------|-----------|-------------|-------------|---------------|
| Complex 1                   |           |             |             |               |
| O4-H4A...O5                 | 0.82      | 1.83        | 2.634(6)    | 168.6         |
| O4-H4B...O6 <sup>#1</sup>   | 0.82      | 1.88        | 2.680(13)   | 165.7         |
| Complex 2                   |           |             |             |               |
| O4-H4A...O1S                | 0.82      | 1.86        | 2.663(8)    | 164.2         |
| O4-H34B...O1T <sup>#1</sup> | 0.82      | 1.88        | 2.662(19)   | 160.3         |

Symmetry codes: #1 =  $5/4 - y, x - 3/4, 1/4 - z$  in **1**; #1 =  $5/4 - y, x + 1/4, 1/4 - z$  in **2**.

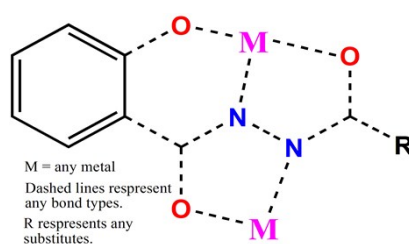

**Fig. S1** The indexing structural unit used in the CSD search for metallocrowns.

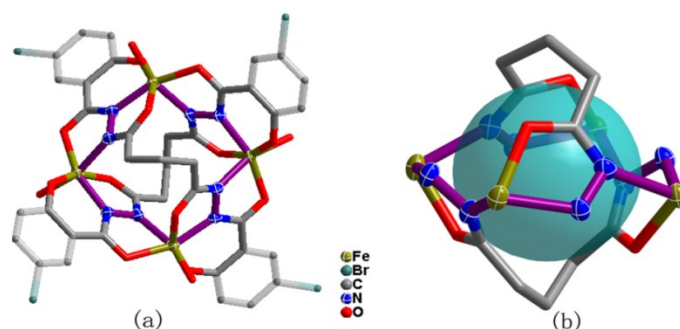

**Fig. S2** (a) The structure of compound 2 without solution molecules and (b) the tetrahedron inside.

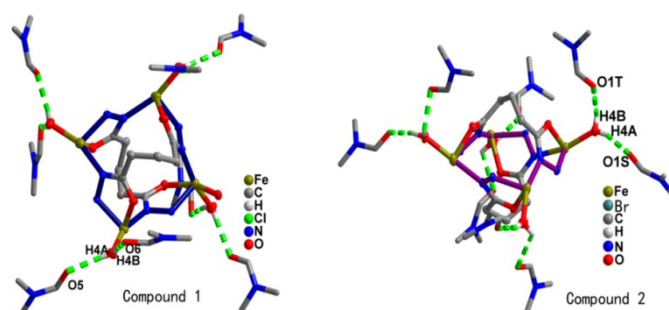

**Fig. S3** The hydrogen bonds between four coordinated water and eight lattice solvent molecules DMF.

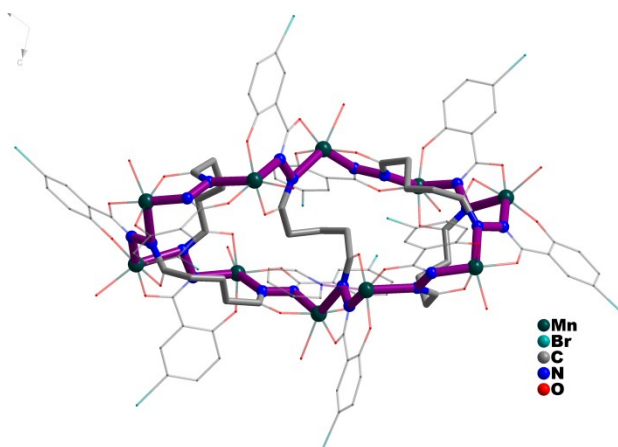

**Fig. S4** The structure of compound 4 without hydrogen atoms and solvent molecules.

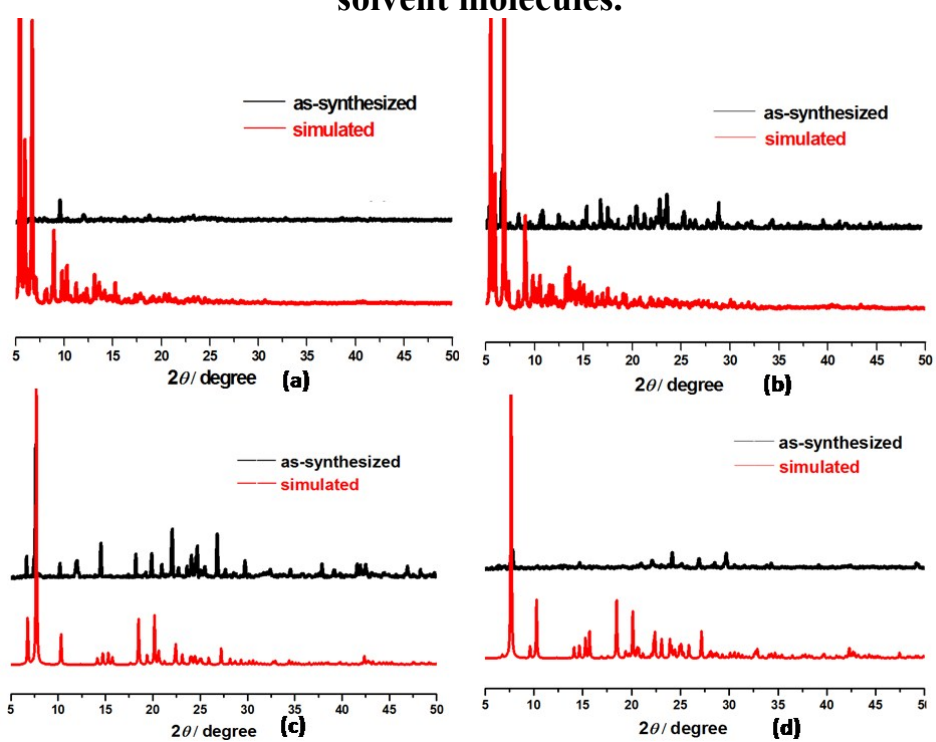

**Fig. S5** The theoretical and experimental PXRD of compounds 1 for (a), 2 for (b), 3 for (c) and 4 for (d).

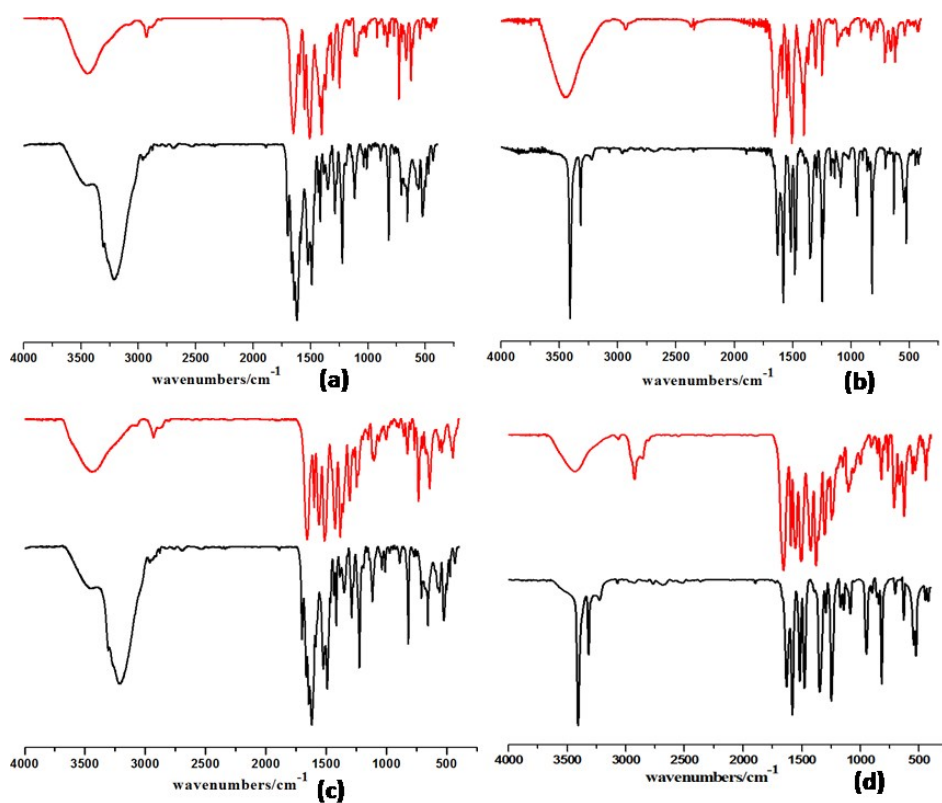

**Fig. S6** The IR spectra of compound 1 for (a), 2 for (b), 3 for (c), 4 for (d) (red) and ligands (black).

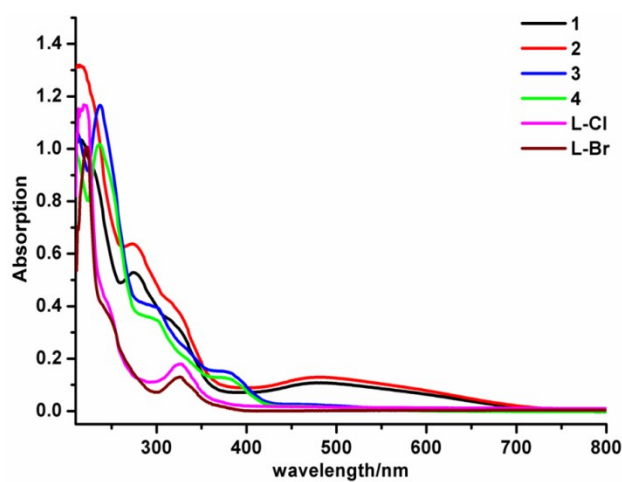

**Fig. S7** The UV spectra of compound 1-4 and the relative ligands.

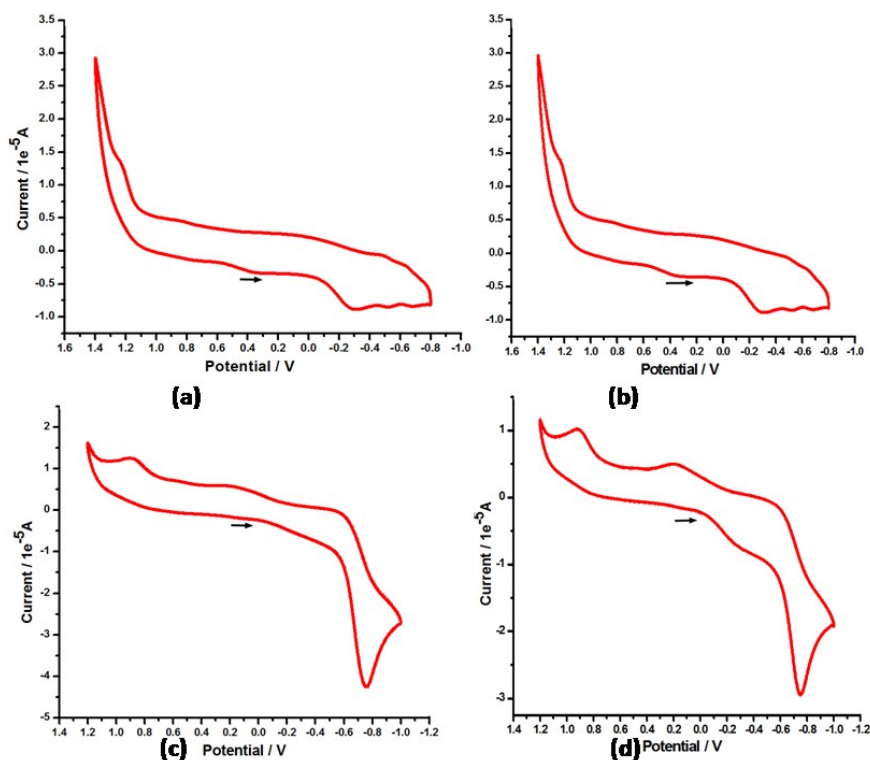

**Fig. S8** Cyclic voltammetry (CV) of compound 1 for (a), 2 for (b), 3 for (c) and 4 for (d) in DMF.

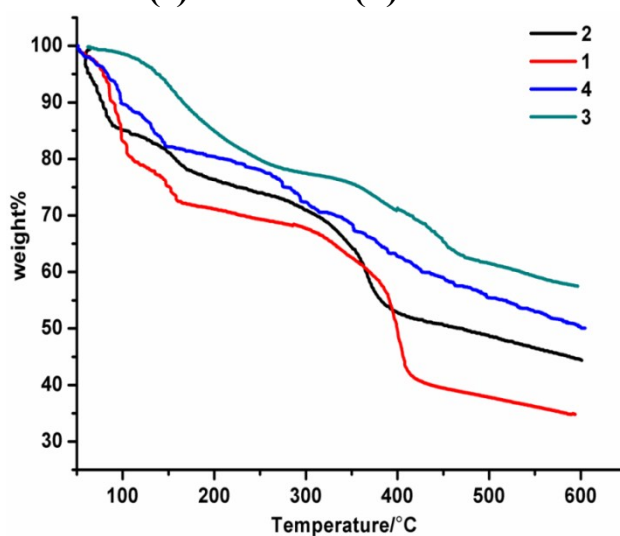

**Fig. S9** Thermal gravimetric of compounds 1-4.

## References

1. O. Kahn, *Molecular Magnetism*; VCH Publishers: Weinheim, 1993; pp 2-4.
2. (a) Sheldrick, G. M. A short history of SHELX. *Acta Crystallogr. Sect. A* **2008**, *64*, 112; (b) Sheldrick, G. M. Program for solution of crystal structures, *University of Göttingen*, **2014**.
3. Spek, A. L. *Acta Cryst. D65*, **2009**, *148*, 155.
